# Supplementary material for: Impacts of reductions in non-methane short-lived climate forcers on future climate extremes and the resulting population exposure risks in eastern and southern Asia
Source: Copernicus journal article supplement (doi:10.5194/acp-23-2499-2023), 2023-02-23
Supplement: Supplementary file 1 [file acp-23-2499-2023-supplement.pdf]

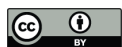

*Supplement of*

**Impacts of reductions in non-methane short-lived climate forcers on future climate extremes and the resulting population exposure risks in eastern and southern Asia**

**Yingfang Li et al.**

*Correspondence to:* Zhili Wang ([wangzl@cma.gov.cn](mailto:wangzl@cma.gov.cn))

The copyright of individual parts of the supplement might differ from the article licence.

## Supplementary method

### Signal-to-noise ratio calculation

10 To quantitatively characterize the confidence of the multi-model ensemble (MME) signal, we also introduced the signal-to-noise ratio ( $S_{NR}$ ), which was the ratio between the climate change signal and the noise (Shi et al., 2018), defined as the ratio of the absolute value of the multi-model ensemble (MME) mean to the deviation among the models:

$$S_{NR} = \frac{|x_e|}{S_x}, \quad (1)$$

$$S_x = \sqrt{\frac{1}{n} \sum_{i=1}^n (x_i - x_e)^2}, \quad (2)$$

15 where  $S_x$  denotes the deviation among the models,  $x_e$  denotes the MME mean,  $x_i$  denotes the variable simulated in individual model, and  $n$  is the number of models used.  $S_{NR} > 1$  indicates that the climate change (signal) from the MME is greater than the deviation (noise) among the models, which means the projected results of the models has a higher confidence level. On the contrary,  $S_{NR} < 1$  means that the noise among the models is greater than the signal from the MME, representing a lower credibility (Li and Zhou, 2010).

20 In addition, we also performed the test of confidence level on the MME result. The regions with significance at  $\geq 95\%$  confidence level from the t-test were broadly in line with those with signal-to-noise ratio larger than 1. So we only show the results of the signal-to-noise ratio here.

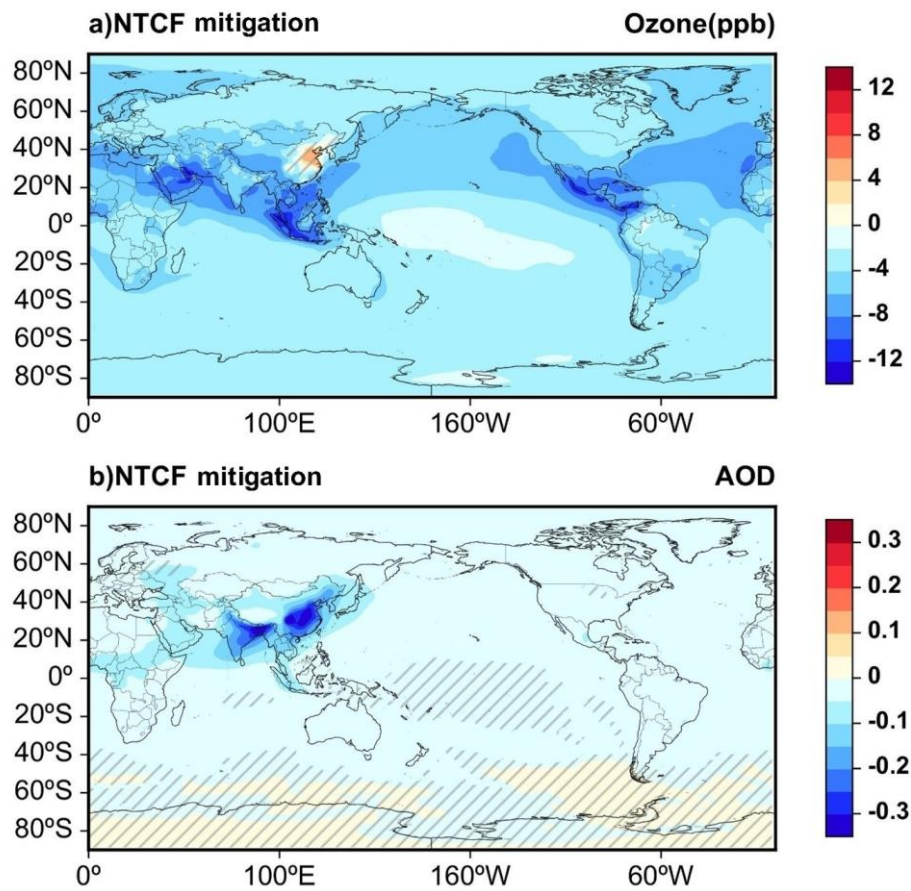

25 **Figure S1: Spatial patterns of changes in ground-level ozone concentration and aerosol optical depth at 550 nm during 2031-2050 caused by non-methane SLCFs mitigation. The areas with hatching indicate that signal to noise ratio ( $S_{NR}$ ) is less than 1.**

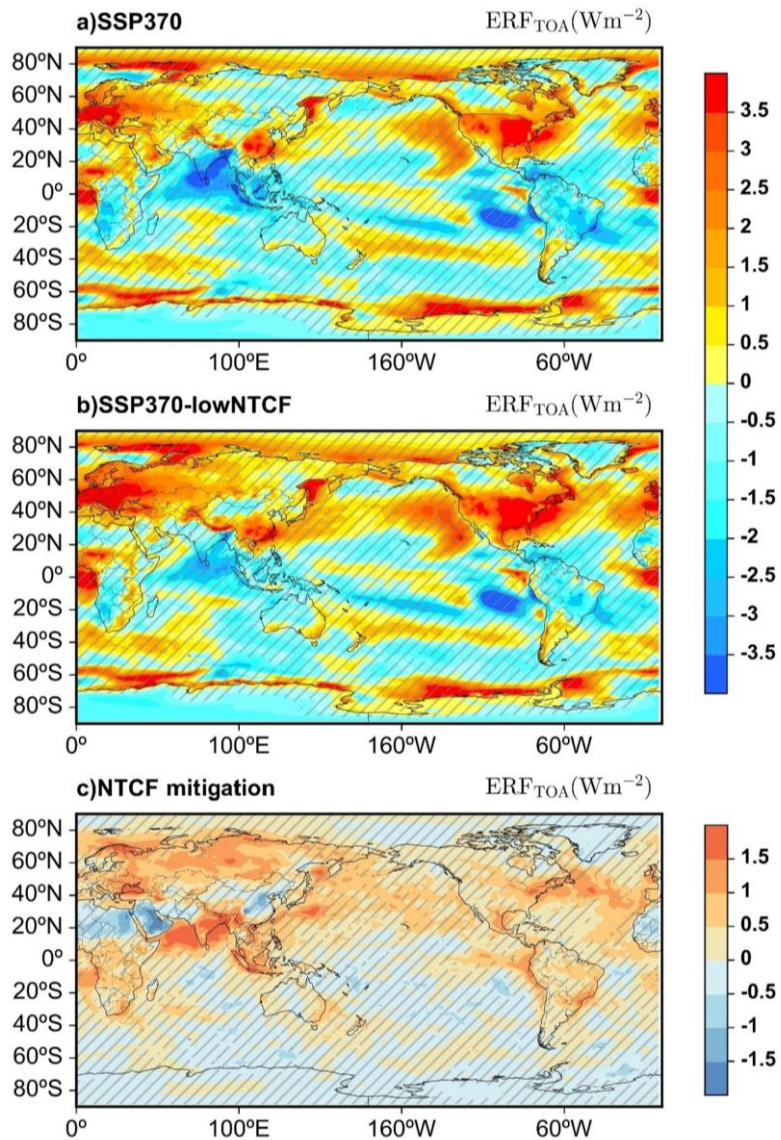

**Figure S2:** Spatial patterns of effective radiative forcing (ERF) during 2031-2050 under the (a) SSP3-7.0 and (b) SSP3-7.0-lowNTCF scenarios and (c) only caused by the non-methane SLCFs reductions relative to 1995-2014 (units:  $\text{W m}^{-2}$ ). The areas with hatching indicate that signal to noise ratio ( $S_{NR}$ ) is less than 1.

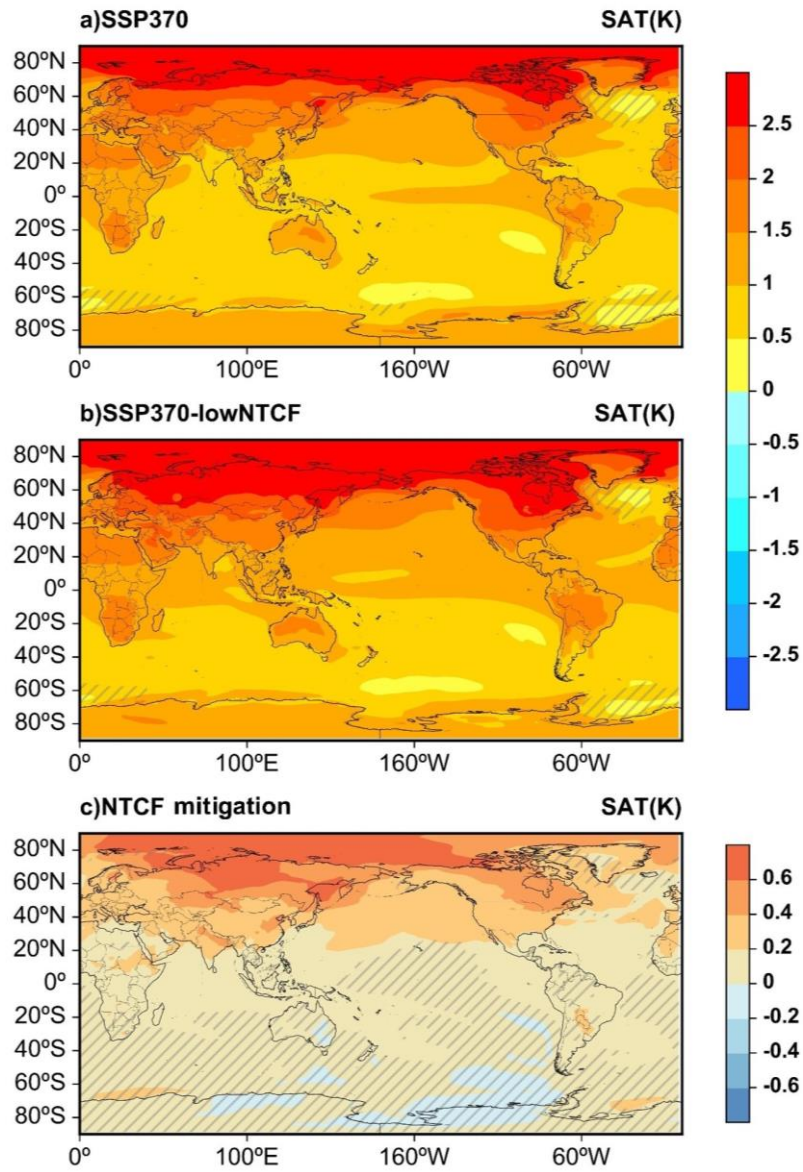

**Figure S3: Spatial patterns of changes in surface air temperature (SAT) during 2031-2050 under the (a) SSP3-7.0 and (b) SSP3-7.0-lowNTCF scenarios and (c) only caused by the non-methane SLCFs reductions relative to 1995-2014 (units: K). The areas with hatching indicate that signal to noise ratio ( $S_{NR}$ ) is less than 1.**

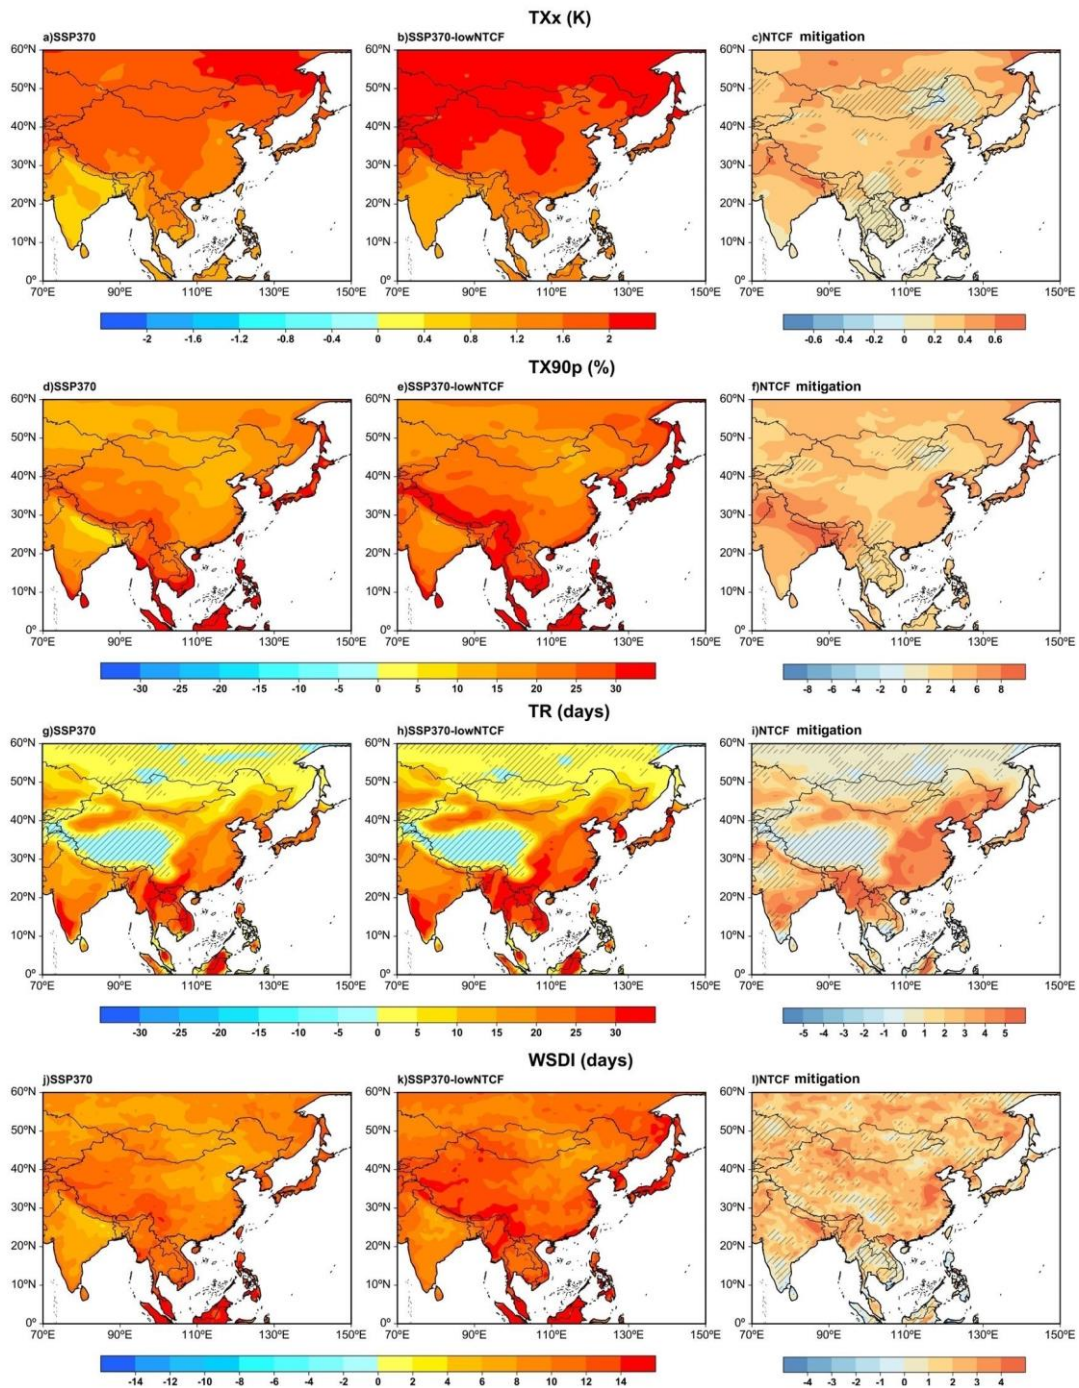

35

Figure S4: Spatial patterns of changes in the hottest day (TXx), warm days (TX90p), tropical nights (TR), and warm spell duration (WSDI) during 2031-2050 in Asia under the SSP3-7.0 (left column) and SSP3-7.0-lowNCTCF (middle column) scenarios relative to 1995-2014. The right column represents changes caused by the non-methane SLCFs mitigation. The areas with hatching indicate that signal to noise ratio ( $S_{NR}$ ) is less than 1.

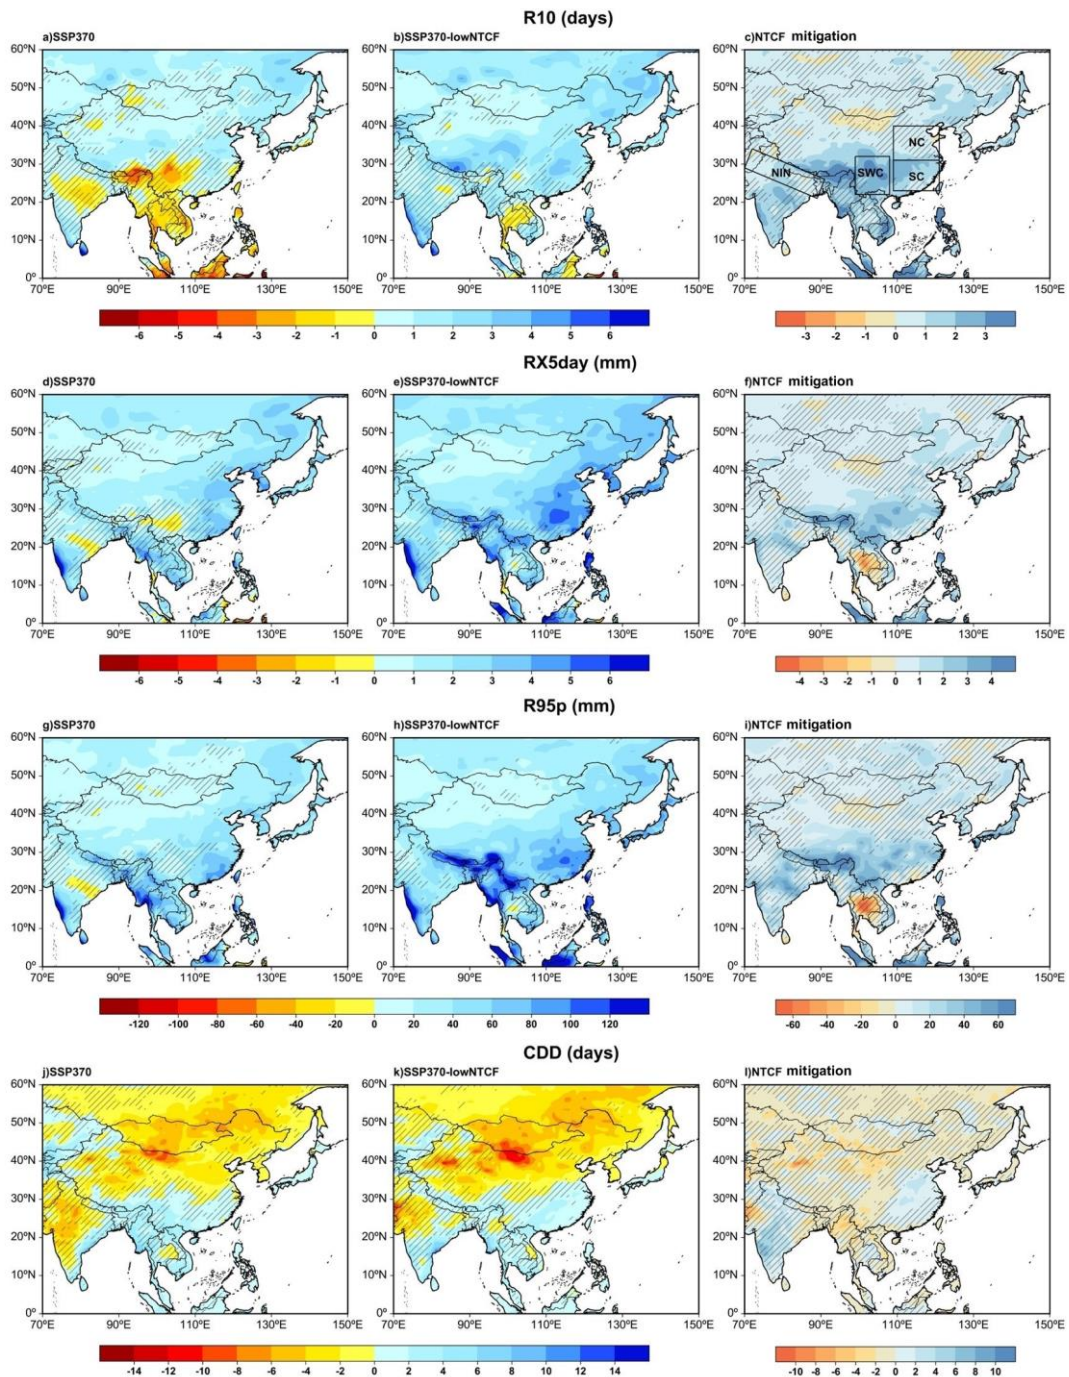

**Figure S5: Spatial patterns of changes in heavy precipitation (R10), maximum consecutive 5-day precipitation (RX5day), days, total wet-day precipitation (R95p), and consecutive dry days (CDD) during 2031-2050 in Asia under the SSP3-7.0 (left column) and SSP3-7.0-lowNTCF (middle column) scenarios relative to 1995-2014. The right column represents changes caused by the non-methane SLCFs mitigation. The areas with hatching indicate that signal to noise ratio ( $S_{NR}$ ) is less than 1.**

## 45 **References**

- Shi, C., Jiang, Z.-H., Chen, W.-L., and Li, L.: Changes in temperature extremes over China under 1.5 °C and 2 °C global warming targets, *Adv. Clim. Chang. Res.*, 9, 120–129, <https://doi.org/https://doi.org/10.1016/j.accre.2017.11.003>, 2018.
- Li, B., and Zhou, T. J.: Projected climate change over China under SRES A1B scenario: multi-model ensemble and uncertainties (in Chinese). *Adv. Clim. Change. Res.*, 6 (4), 270-276, 2010.
